# Supplementary material for: Iron-doped β-Ga2O3 single crystal: the iron occupying site and optical properties
Source: Royal Society of Chemistry journal article supplement (doi:10.1039/d5ce00062a), 2025-01-01
Supplement: d5ce00062a1.pdf [file d5ce00062a1.pdf]

Supporting Information  
for  
Iron-doped  $\beta$ -Ga<sub>2</sub>O<sub>3</sub> single crystal: iron occupying site and  
optical properties

Yuchao Du <sup>1#</sup>, Chaoyi Zhang <sup>2#</sup>, Shuting Cui <sup>1</sup>, Guoping Li <sup>3</sup>, Ning Tang <sup>3</sup>, Bo Shen <sup>3</sup>,

Jun Xu <sup>2</sup>, Huili Tang <sup>2\*</sup>, Lijuan Zhao <sup>1\*</sup>

<sup>1</sup> Materials Genome Institute, Shanghai University, Shanghai 200444, P. R. China

<sup>2</sup> School of Physics Science and Engineering, Tongji University, Shanghai 200092, P. R. China

<sup>3</sup> School of Physics, Peking University, Beijing 100871, P. R. China

# These two authors contributed equally

\*Corresponding Authors

Dr. Lijuan Zhao, Email address: [zhaolijuan@t.shu.edu.cn](mailto:zhaolijuan@t.shu.edu.cn)

Dr. Huili Tang, Email address:

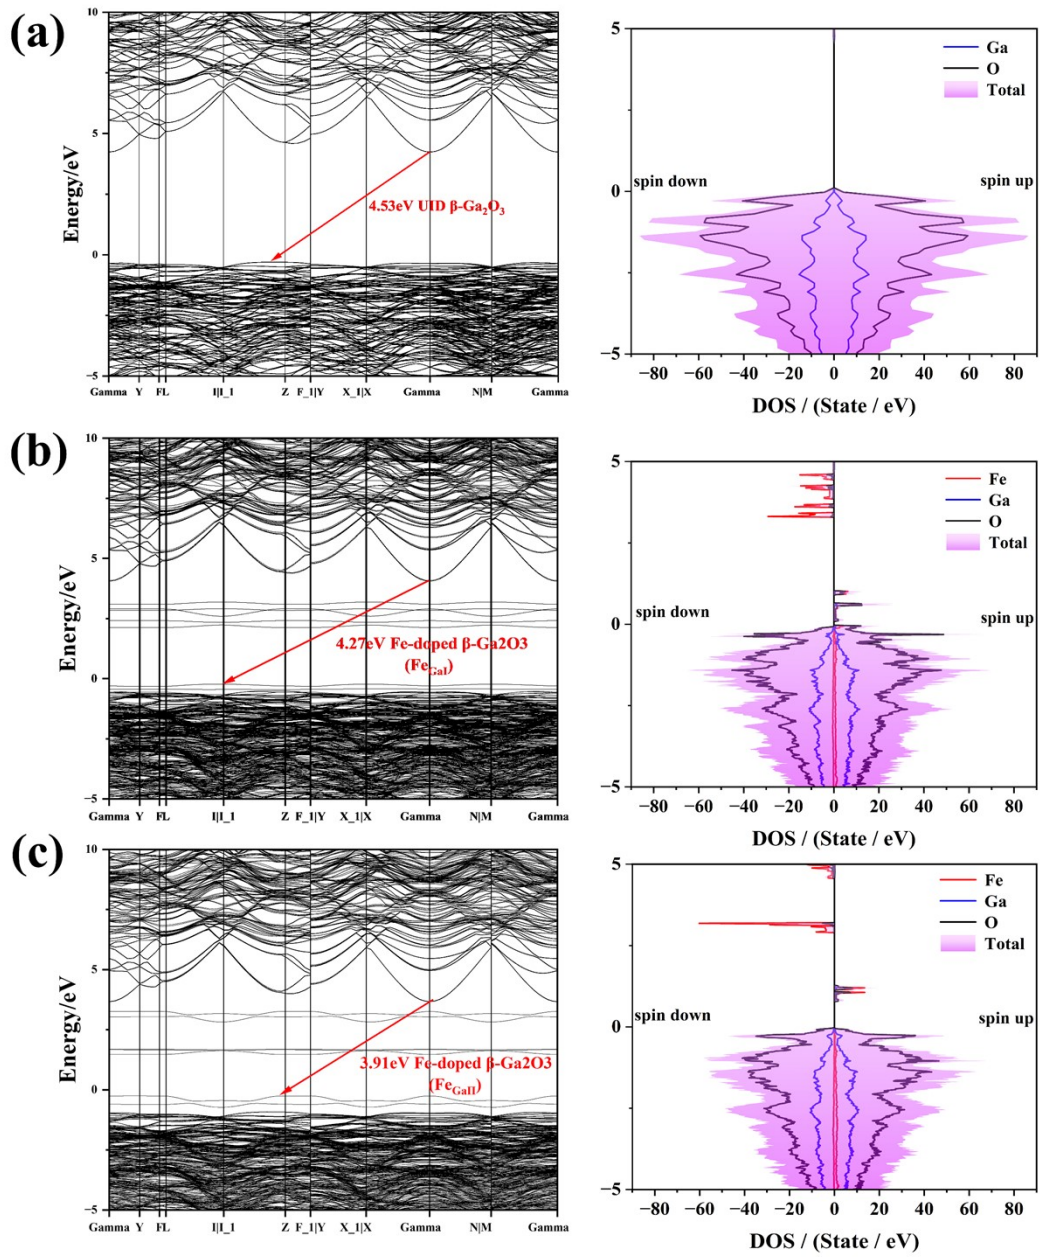

Fig. S1 The bandgap and DOS of the UID  $\beta\text{-Ga}_2\text{O}_3$  and Fe-doped  $\beta\text{-Ga}_2\text{O}_3$  where (a) UID  $\beta\text{-Ga}_2\text{O}_3$  (b) Fe replacing  $\text{Ga}_{\text{I}}$  site and (c) Fe replacing  $\text{Ga}_{\text{II}}$  site.

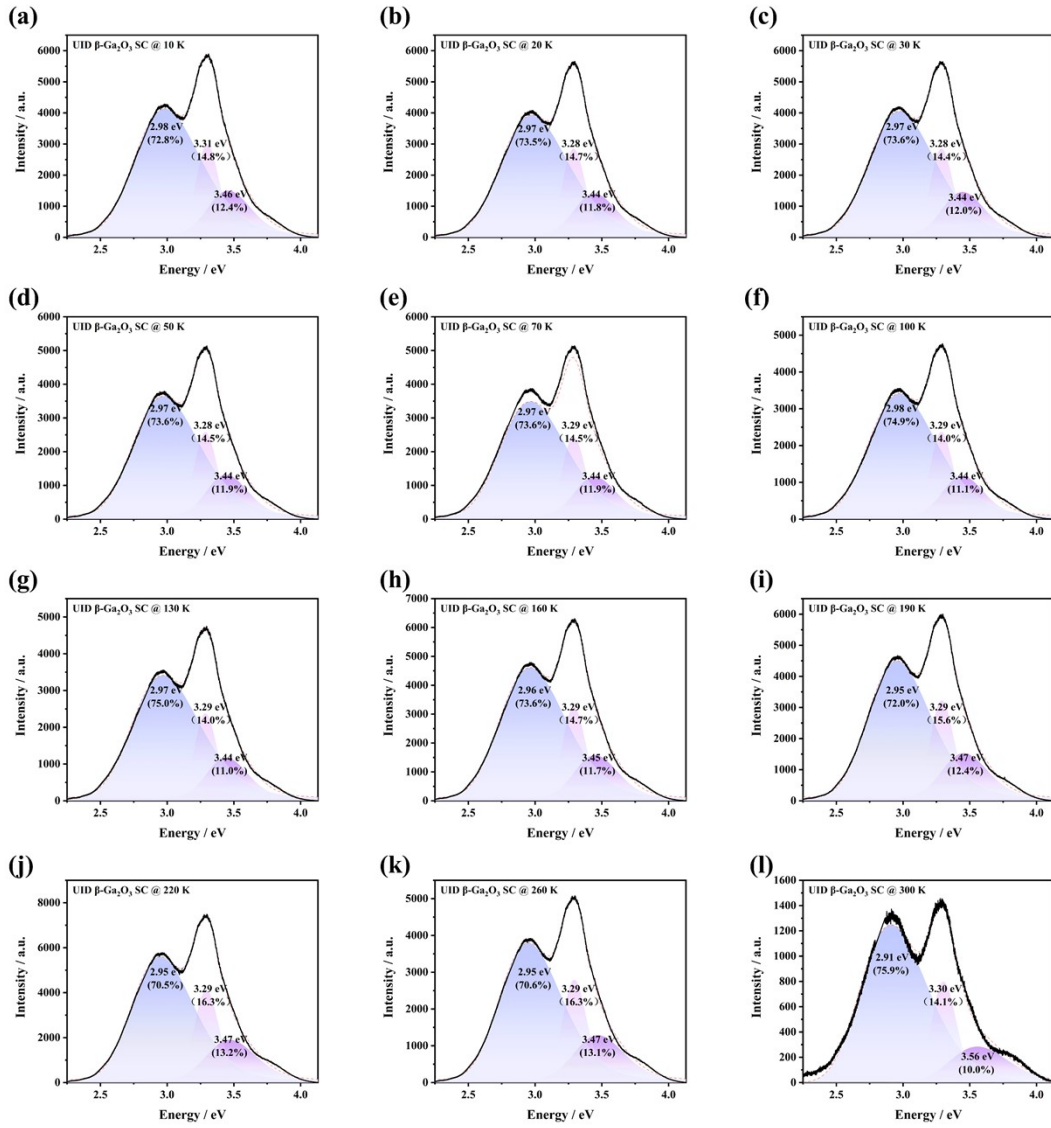

Fig. S2 (a-l) The Gaussian fitting curves of temperature-dependent PL spectra of the UID  $\beta$ -Ga<sub>2</sub>O<sub>3</sub> SC from 10 K to 300 K.

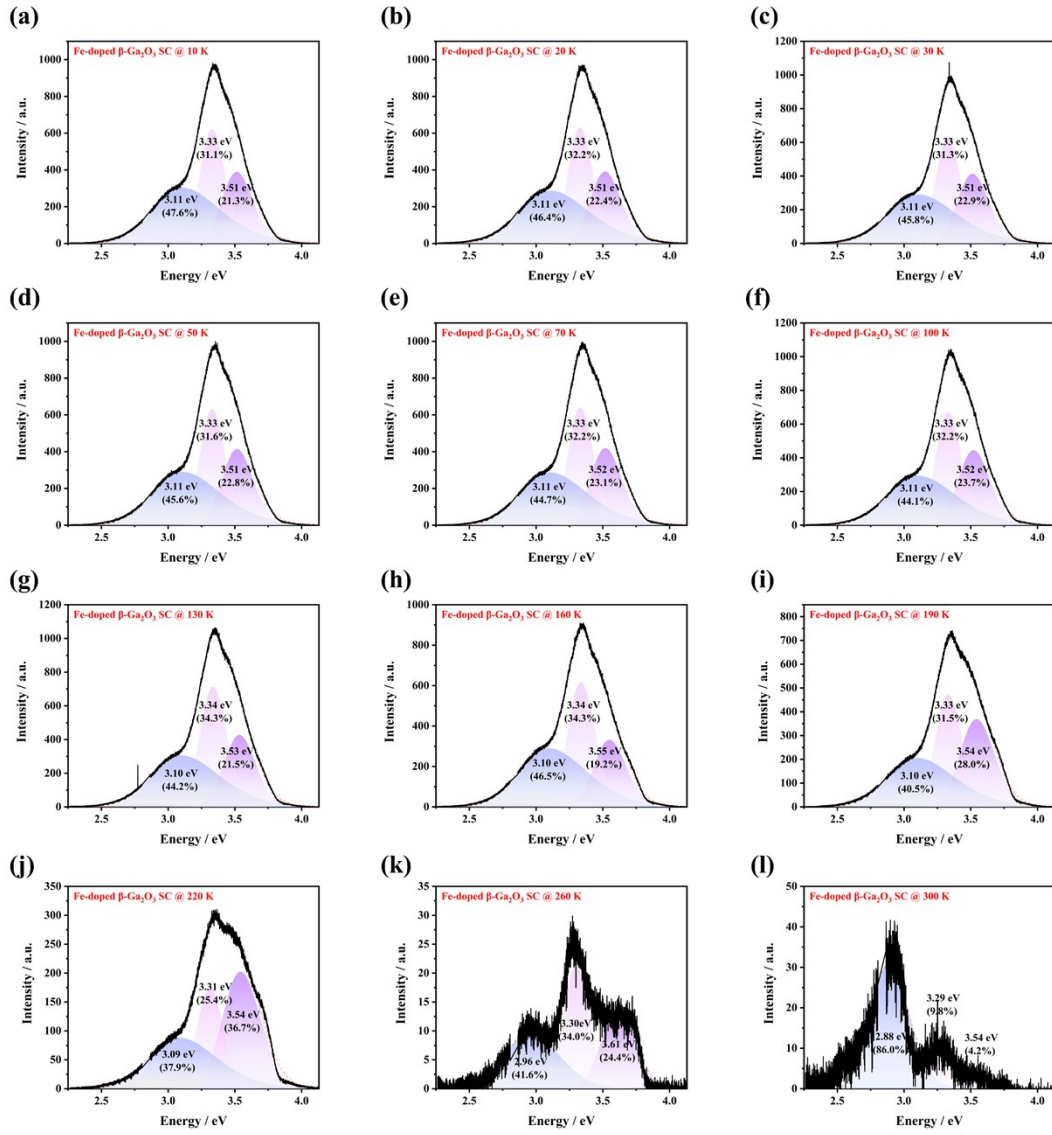

Fig. S3 (a-l) The Gaussian fitting curves of temperature-dependent PL spectra of Fe-doped  $\beta$ -Ga<sub>2</sub>O<sub>3</sub> SC from 10 K to 300 K.
